# Supplementary material for: Effect of Atmospheric-Pressure Plasma Treatments on Fracture Toughness of Carbon Fibers-Reinforced Composites
Source: MDPI journal article supplement (doi:10.3390/molecules26123698), 2021-06-17
Supplement: s1 [file s1]

# Supplementary Materials

## Effect of atmospheric-pressure plasma treatments on fracture toughness of carbon fibers-reinforced composites

Won-Jong Kim, Young-Jung Heo, Jong-Hoon Lee, Kyong Yop Rhee<sup>\*\*</sup>, and Soo-Jin Park<sup>\*</sup>

<sup>\*</sup> *Department of Chemistry, Inha University, 100 Inharo, Incheon 22212, Republic of Korea*

<sup>\*\*</sup> *Department of Mechanical Engineering, College of Engineering, Kyung Hee University, Yongin 17104, Republic of Korea*

<sup>\*</sup> Corresponding author. Tel.: +82-32-876-7234; Fax: +82-32-867-5604.

<sup>\*\*</sup> Corresponding author. Tel.: +82-31-201-2565; Fax: +82-31-202-6693.

*E-mail address: sjpark@inha.ac.kr (S. -J. Park) and rheeky@khu.ac.kr (K. Y. Rhee)*

**Table S1.** XPS results for atomic concentrations of SWCNTs and P-SWCNTs.

| Samples | XPS atomic (%)  |                 |                                  |
|---------|-----------------|-----------------|----------------------------------|
|         | C <sub>1s</sub> | O <sub>1s</sub> | C <sub>1s</sub> /O <sub>1s</sub> |
| SWCNT   | 95.79           | 4.21            | 0.04                             |
| P-SWCNT | 92.14           | 7.86            | 22.7                             |

**Table S2.** Surface free energy for wetting liquids.

| Wetting liquids | $\gamma^L$ (mJ.m <sup>-2</sup> ) | $\gamma_L^L$ (mJ.m <sup>-2</sup> ) | $\gamma_L^{SP}$ (mJ.m <sup>-2</sup> ) |
|-----------------|----------------------------------|------------------------------------|---------------------------------------|
| Distilled water | 72.80                            | 21.80                              | 0.38                                  |
| Diiodomethane   | 50.80                            | 50.42                              | 51.00                                 |
| Ethylene glycol | 47.70                            | 31.00                              | 16.70                                 |

**Table S3.** Contact angles of SCE and P-SCE composites for three wetting liquids.

| Specimens | Contact angles ( $\theta$ ) |                |                 |
|-----------|-----------------------------|----------------|-----------------|
|           | Distilled water             | Diiodomethane  | Ethylene glycol |
| NEAT      | $78.1 \pm 0.3$              | $42.1 \pm 0.2$ | $59.8 \pm 0.4$  |
| SCE1      | $76.2 \pm 0.5$              | $41.9 \pm 0.4$ | $58.6 \pm 0.2$  |
| SCE2      | $73.5 \pm 0.2$              | $41.2 \pm 0.3$ | $56.3 \pm 0.3$  |
| SCE3      | $70.2 \pm 0.2$              | $40.5 \pm 0.4$ | $53.2 \pm 0.3$  |
| SCE4      | $72.0 \pm 0.3$              | $40.1 \pm 0.1$ | $56.7 \pm 0.5$  |
| SCE5      | $73.8 \pm 0.1$              | $42.5 \pm 0.2$ | $54.1 \pm 0.4$  |
| P-SCE1    | $67.9 \pm 0.4$              | $40.2 \pm 0.6$ | $44.6 \pm 0.2$  |
| P-SCE2    | $65.6 \pm 0.2$              | $39.9 \pm 0.3$ | $44.1 \pm 0.2$  |
| P-SCE3    | $61.7 \pm 0.3$              | $37.8 \pm 0.1$ | $43.1 \pm 0.3$  |
| P-SCE4    | $66.8 \pm 0.5$              | $40.1 \pm 0.2$ | $46.5 \pm 0.3$  |
| P-SCE5    | $67.7 \pm 0.3$              | $42.1 \pm 0.3$ | $42.7 \pm 0.4$  |

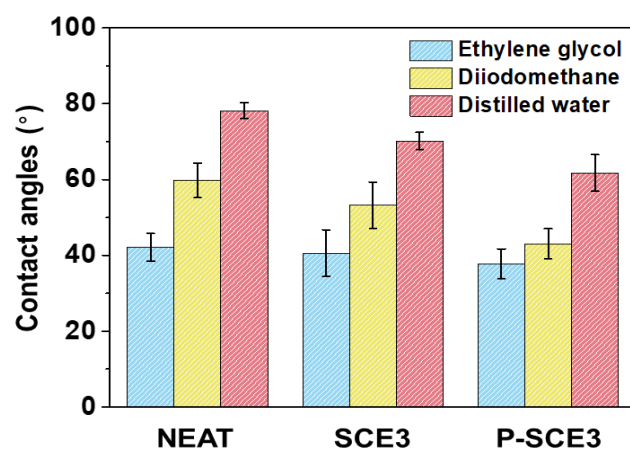

**Fig. S1.** Three wetting liquids were shown by comparing the contact Angles value of Neat, SCE3, and P-SCE3 composites.
